# Supplementary material for: Distinctive Features of the XBB.1.5 and XBB.1.16 Spike Protein Receptor-Binding Domains and Their Roles in Conformational Changes and Angiotensin-Converting Enzyme 2 Binding
Source: MDPI journal article supplement (doi:10.3390/ijms241612586), 2023-08-09
Supplement: s1 [file s1]

## Supplementary Material

### **Distinctive features of the XBB.1.5 and XBB.1.16 Spike Protein RBDs and their roles in conformational changes and ACE2 binding**

**Tej Sharma <sup>1</sup>, Bernard Gerstman<sup>1,2</sup> and Prem Chapagain<sup>1,2,\*</sup>**

<sup>1</sup> Department of Physics, Florida International University, Miami, FL 33199, USA

<sup>2</sup> Biomolecular Sciences Institute, Florida International University, Miami, FL 33199, USA

\* Correspondence: chapagap@fiu.edu; Tel.: +1 305 348 6266

Table S1

Figure S1

Figure S2

Figure S3

Figure S4

Video S1

Video S2

Table S1. List of all molecular systems used in this work. The WT, delta and omicron simulations of the RBD-only, RBD-hACE2, and WT and Omicron RBD-down Trimer systems are from earlier work (indicated by one \*) and all others are new simulations.

| System    | Variant/ (PDB ID)          | # Water | Ion Conc. | # Atoms (total) | Box Size (Å) <sup>3</sup> | Time (ns) |
|-----------|----------------------------|---------|-----------|-----------------|---------------------------|-----------|
| RBD Only  | XBB.1.5 (Mutated on 7T9L)  | 28,360  | 0.15 M    | 835,23          | 96x96x96                  | 1000      |
|           | XBB.1.16 (Mutated on 7T9L) | 24,765  | 0.15 M    | 72,749          | 92x92x92                  | 1000      |
| RBD-hACE2 | Delta* (7W9I)              | 75,956  | 0.15 M    | 242,060         | 138x138x138               | 200       |
|           | Omicron* (7T9L)            | 70,801  | 0.15 M    | 226,700         | 134x134x134               | 200       |
|           | XBB.1.5 (Mutated on 7T9L)  | 82,424  | 0.15 M    | 242,286         | 137x137x137               | 300       |
|           | XBB.1.5 Run 2**            | 82,424  | 0.15 M    | 242,286         | 137x137x137               | 100       |
|           | XBB.1.16 (Mutated on 7T9L) | 77,837  | 0.15 M    | 247,015         | 144x144x144               | 300       |
|           | XBB.1.16 Run 2**           | 77,140  | 0.15 M    | 246,725         | 144x144x144               | 100       |
|           | XBB.1.16 Run 3**           | 77,155  | 0.15 M    | 246,205         | 141x141x141               | 100       |
|           | XBB.1.5/XBB.1.16***        | 89,355  | 0.15 M    | 261,559         | 141x141x141               | 100       |
| RBD-down  | RBD-down Trimer            |         |           |                 |                           |           |

Simulations extended from 100 to 200ns from ref. Hossen, M.L., et al. *PCCP* **24**, 9123-9129 (2022).

\*\* Rerun from the last frame of 200 ns of XBB.1.5 (mutated on 7T9L).

\*\*\*Residues in the truncated systems: Chain A (330-530); Chain B (30-530, 968-1000); Chain C (330-530, 968-1000).

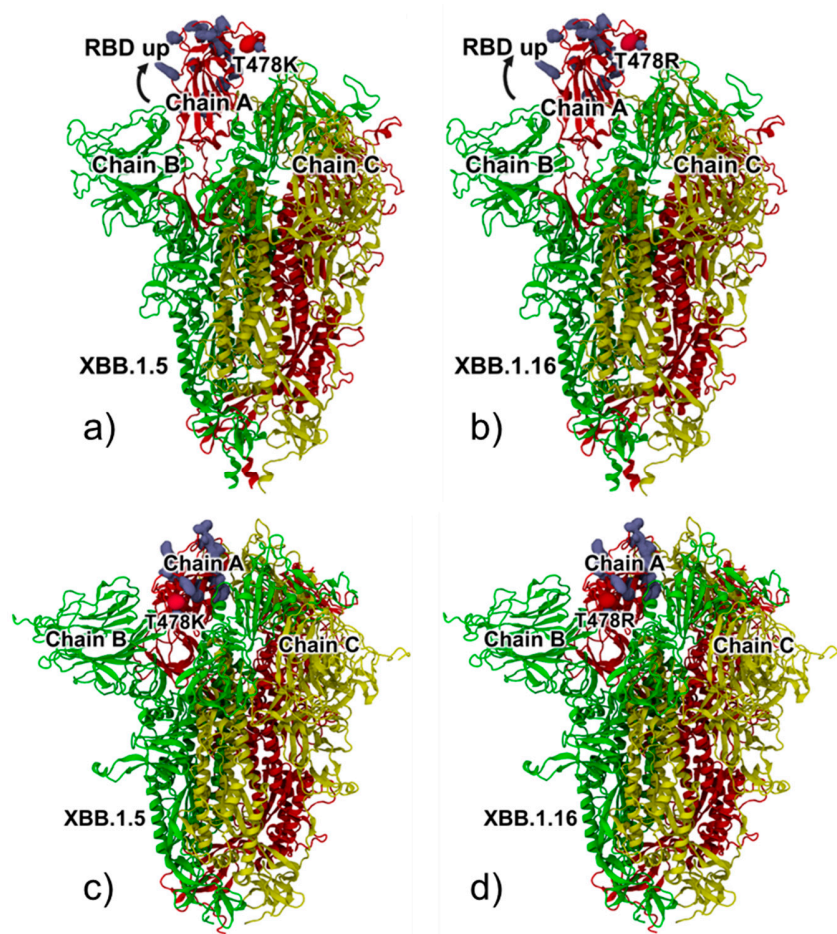

Figure S1. The RBD-up conformation for the spike trimer, showing the mutations in the RBD of chain A of a) XBB.1.5 and b) XBB.1.16. The RBD-down conformation for c) XBB.1.5 and d) XBB.1.16, showing the same mutations as in a-b. The T478K/R mutations highlighted in red surface.

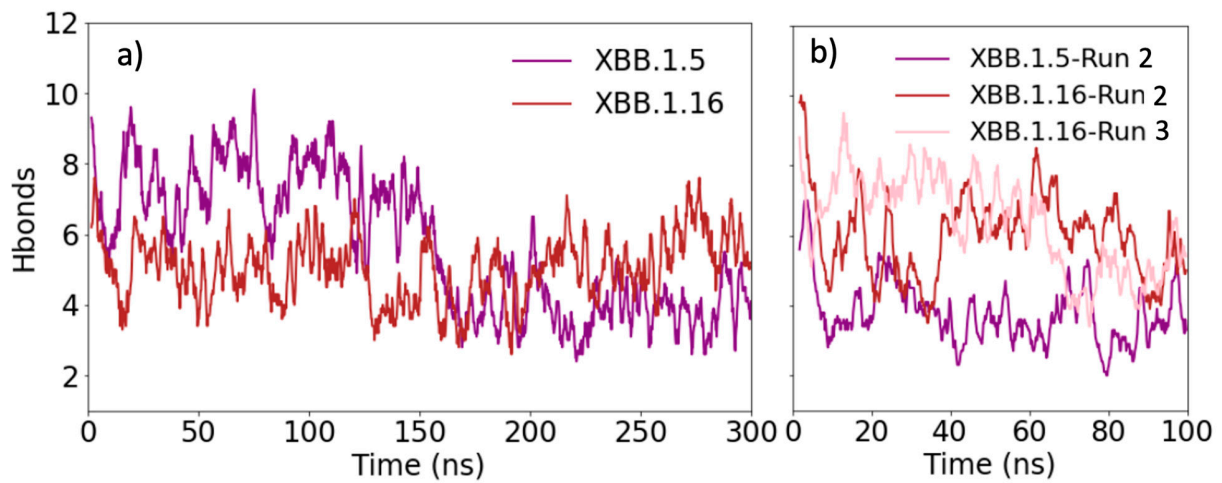

Figure S2. Number of hydrogen bonds between RBD and ACE2 for XBB.1.5 and XBB.1.16 as a function of time. a) For both XBB.1.5 and XBB.1.16, mutations were introduced to omicron RBD. Therefore, the simulations started from the structure of the omicron RBD-ACE2 complex. b) Reruns of XBB.1.5 and XBB.1.16, starting from the frame extracted at 200-ns of the XBB.1.5 of a). Even though both reruns of XBB.1.16 were started from the XBB.1.5 structure, hydrogen bonds were restored, whereas the number of hydrogen bonds remained lower in the rerun of XBB.1.5.

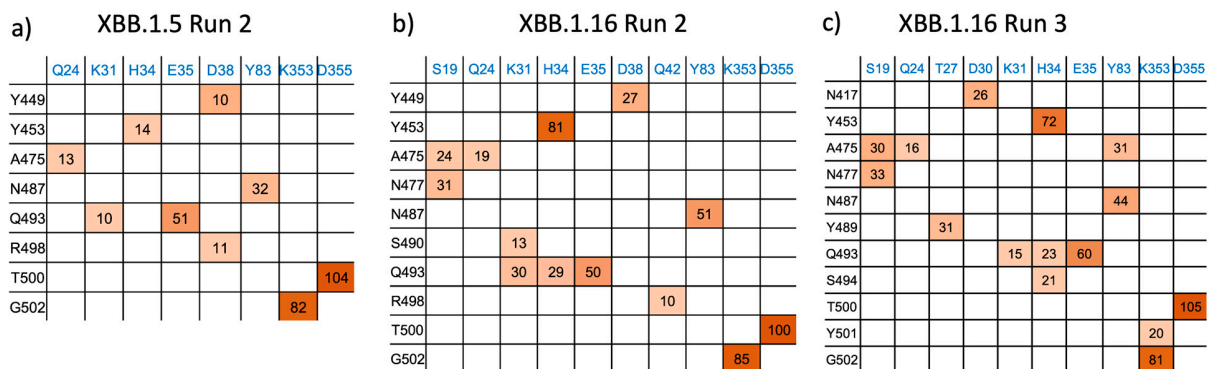

Figure S3. Hydrogen bond occupancies for the interacting residue pairs of RBD and ACE2 for the reruns of Fig. S2. a) XBB.1.5 run 2 a) XBB.1.16 run 2 c) XBB.1.16 run 3.

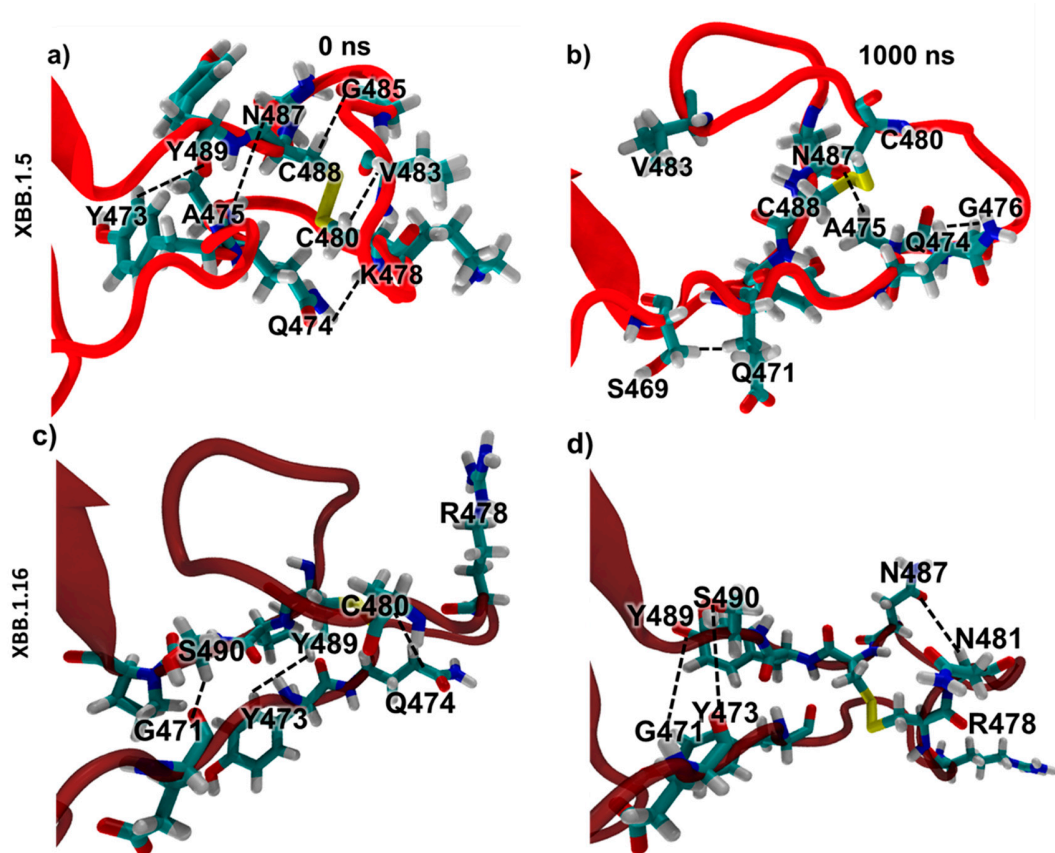

Figure S4. Representative conformations of the a,b) XBB.1.5 and c,d) XBB.1.16 variants displaying hydrogen bonding within the loop residues. The analysis was carried out for the first 20 ns and last 20 ns of a 1000 ns simulation. The initial configuration used for XBB.1.5 was the same as the omicron structure, whereas the initial configuration used for XBB.1.16 was the final configuration from the XBB.1.5 simulation.

Video S1. Conformational dynamics of the Spike protein RBD of XBB.1.5 from a 1000 ns simulation trajectory of the RBD-only system.

Video S2. Conformational dynamics of the Spike protein RBD of XBB.1.16 from a 1000 ns simulation trajectory of the RBD-only system.
